# Supplementary material for: Combinatorial Gli activity directs immune infiltration and tumor growth in pancreatic cancer
Source: PubMed Central journal article supplement (PMC9348714; doi:10.1371/journal.pgen.1010315), 2022-07-22
Supplement: pgen.1010315.s009.pdf [file pgen.1010315.s009.pdf]

**S1 Table**

| <b>Antibody</b>               | <b>Host species</b> | <b>Catalog Number</b>  | <b>Dilution</b> |
|-------------------------------|---------------------|------------------------|-----------------|
| $\beta$ -Gal                  | Chicken             | Abcam ab9361           | 1:2500          |
| $\beta$ -Gal                  | Chicken             | ICL Cgal-45A-Z         | 1:2000          |
| Vimentin                      | Rabbit              | Cell Signaling cs5741  | 1:500           |
| CK19 (Troma-III)              | Rat                 | DHSB AB_2133570        | 1:100           |
| CD31                          | Rat                 | BD Biosciences 550274  | 1:500           |
| Ecad                          | Mouse               | BD Biosciences 610181  | 1:100           |
| CD45                          | Rat                 | BD Biosciences 553076  | 1:100           |
| F4/80                         | Rat                 | BMA Biomedicals T-2006 | 1:100           |
| Arg1                          | Rabbit              | Cell Signaling 93668   | 1:75 (TSA)      |
| tdTomato (RFP)                | Rabbit              | Rockland 600-401-379   | 1:200           |
| PDGFR-Beta                    | Rabbit              | Abcam ab32570          | 1:200           |
| CD3                           | Rabbit              | Abcam ab5690           | 1:500           |
| CD8                           | Rabbit              | Cell Signaling 98941S  | 1:500           |
| Alpha-Amylase                 | Rabbit              | Sigma A8273            | 1:100           |
| pHH3                          | Mouse               | Cell Signaling 9706S   | 1:100           |
| Cleaved Caspase-3<br>(Asp175) | Rabbit              | Cell Signaling 9661S   | 1:200           |
