# Supplementary material for: Combinatorial Gli activity directs immune infiltration and tumor growth in pancreatic cancer
Source: PubMed Central journal article supplement (PMC9348714; doi:10.1371/journal.pgen.1010315), 2022-07-22
Supplement: pgen.1010315.s010.pdf [file pgen.1010315.s010.pdf]

**S2 Table**

| <b>Antibodies</b> | <b>Host species</b> | <b>Catalog Number</b>  | <b>Clone</b> | <b>Dilution</b> |
|-------------------|---------------------|------------------------|--------------|-----------------|
| CD45              | Rat                 | BD Horizon 563891      | 30-F11       | 1:100           |
| CD11b             | Rat                 | BD Pharmingen 557657   | M1/70        | 1:100           |
| F4/80             | Rat                 | eBioscience 15-4801-82 | BM8          | 1:100           |
| NKp46             | Rat                 | BD Pharmingen 560757   | 29A1.4       | 1:100           |
| GR1               | Rat                 | BD Pharmingen 553127   | R86-8C5      | 1:100           |
| CD3               | Rat                 | BD Pharmingen 555275   | 17A2         | 1:100           |
| CD4               | Rat                 | BD Pharmingen 558107   | RM4-5        | 1:100           |
| CD8               | Rat                 | BD Pharmingen 557654   | 53-6.7       | 1:100           |
| Foxp3             | Rat                 | eBioscience 53-5773-82 | FJK-16s      | 1:100           |
| IFN gamma         | Rat                 | BD Pharmingen 557649   | XMG1.2       | 1:100           |
| IL4               | Rat                 | BD Pharmingen 554436   | 11B11        | 1:100           |
