# Supplementary material for: Combinatorial Gli activity directs immune infiltration and tumor growth in pancreatic cancer
Source: PubMed Central journal article supplement (PMC9348714; doi:10.1371/journal.pgen.1010315), 2022-07-22
Supplement: pgen.1010315.s011.pdf [file pgen.1010315.s011.pdf]

**S3 Table**

| <b>Antibody</b> | <b>Host species</b> | <b>Catalog Number</b> | <b>Dilution</b> |
|-----------------|---------------------|-----------------------|-----------------|
| GLI2            | Goat IgG            | R&D AF3635            | 1:1,000         |
| GLI3            | Goat IgG            | R&D AF3690            | 1:1,000         |
| Vinculin        | Rabbit IgG          | Cell Signaling 13901  | 1:1,000         |
