# Supplementary material for: Combinatorial Gli activity directs immune infiltration and tumor growth in pancreatic cancer
Source: PubMed Central journal article supplement (PMC9348714; doi:10.1371/journal.pgen.1010315), 2022-07-22
Supplement: pgen.1010315.s012.pdf [file pgen.1010315.s012.pdf]

**S4 Table**

| <b>Secondary Antibody</b> | <b>Host species</b> | <b>Catalog Number</b>              | <b>Dilution</b> |
|---------------------------|---------------------|------------------------------------|-----------------|
| anti-goat IgG             | Donkey IgG          | R&D HAF109                         | 1:10,000        |
| anti-Rabbit IgG           | Donkey IgG          | Jackson ImmunoResearch 711-035-152 | 1:5,000         |
