# Supplementary material for: Combinatorial Gli activity directs immune infiltration and tumor growth in pancreatic cancer
Source: PubMed Central journal article supplement (PMC9348714; doi:10.1371/journal.pgen.1010315), 2022-07-22
Supplement: pgen.1010315.s013.pdf [file pgen.1010315.s013.pdf]

S5 Table

| <b>Target Gene</b>      | <b>Forward Primer Sequence (5' → 3')</b> | <b>Reverse Primer Sequence (5' → 3')</b> |
|-------------------------|------------------------------------------|------------------------------------------|
| <i>Il6</i>              | TTCCATCCAGTTGCCTTCTTGG                   | TTCTCATTTCACGATTTCACAG                   |
| <i>Ccl5</i>             | GCCCACGTCAAGGAGTATTT                     | CTTGAACCCACTTCTTCTCTGG                   |
| <i>Il11</i>             | AGGTGGTCCTTCCCTAAAGA                     | GCGAGACATCAAGAGCTGTAA                    |
| <i>Ccl7</i>             | TCAAGAGCTACAGAAGGATCACC                  | ATAGCCTCCTCGACCCACTT                     |
| <i>Gli1</i><br>(mouse)  | GTGCACGTTTGAAGGCTGTC                     | GAGTGGGTCCGATTCTGGTG                     |
| <i>Gli2</i>             | CCTTCACCCACCTTCTTGG                      | CTTGTTCTGGTTGGCATCATT                    |
| <i>Gli3</i>             | CACATGCATCAACAGATCCTAAGC                 | AGGGATAGGTCTCTGTGTTGGA<br>AAT            |
| <i>Ptch1</i><br>(mouse) | GAAGCCACAGAAAACCCTGTC                    | GCCGCAAGCCTTCTCTAGG                      |
| <i>GLI1</i><br>(human)  | CCAACTCCACAGGCATACAGGAT                  | CACAGATTCAGGCTCACGCTTC                   |
| <i>PTCH1</i><br>(human) | GGGTGGCACAGTCAAGAACAG                    | CGTACATTTGCTTGGGAGTCATT                  |
| <i>Il10</i>             | GCTATGCTGCCTGCTCTTACT                    | CCTGCTGATCCTCATGCCA                      |
| <i>Tgfb</i>             | TGACGTCACCTGGAGTTGTACGG                  | GGTTCATGTCATGGATGGTGC                    |
